# Supplementary material
Source: PubMed Central journal article supplement (PMC2833394)
Supplement: mmc1.pdf [file mmc1.pdf]

## Supplemental Data

### Missense Mutations in the Copper Transporter Gene

#### *ATP7A* Cause X-Linked Distal Hereditary Motor Neuropathy

Marina L. Kennerson, Garth A. Nicholson, Stephen G. Kaler, Bartosz Kowalski, Julian F.B. Mercer, Jingrong Tang, Roxana M. Llanos, Shannon Chu, Reinaldo I. Takata, Carlos E. Speck-Martins, Jonathan Baets, Leonardo Almeida-Souza, Dirk Fischer, Vincent Timmerman, Philip E. Taylor, Steven S. Scherer, Toby A. Ferguson, Thomas D Bird, Peter De Jonghe, Shawna M.E. Feely, Michael E. Shy, and James Y. Garbern

Figure S1. Effect of temperature and copper concentration on the intracellular localization of ATP7A at 30°C in cultured T994I fibroblasts.

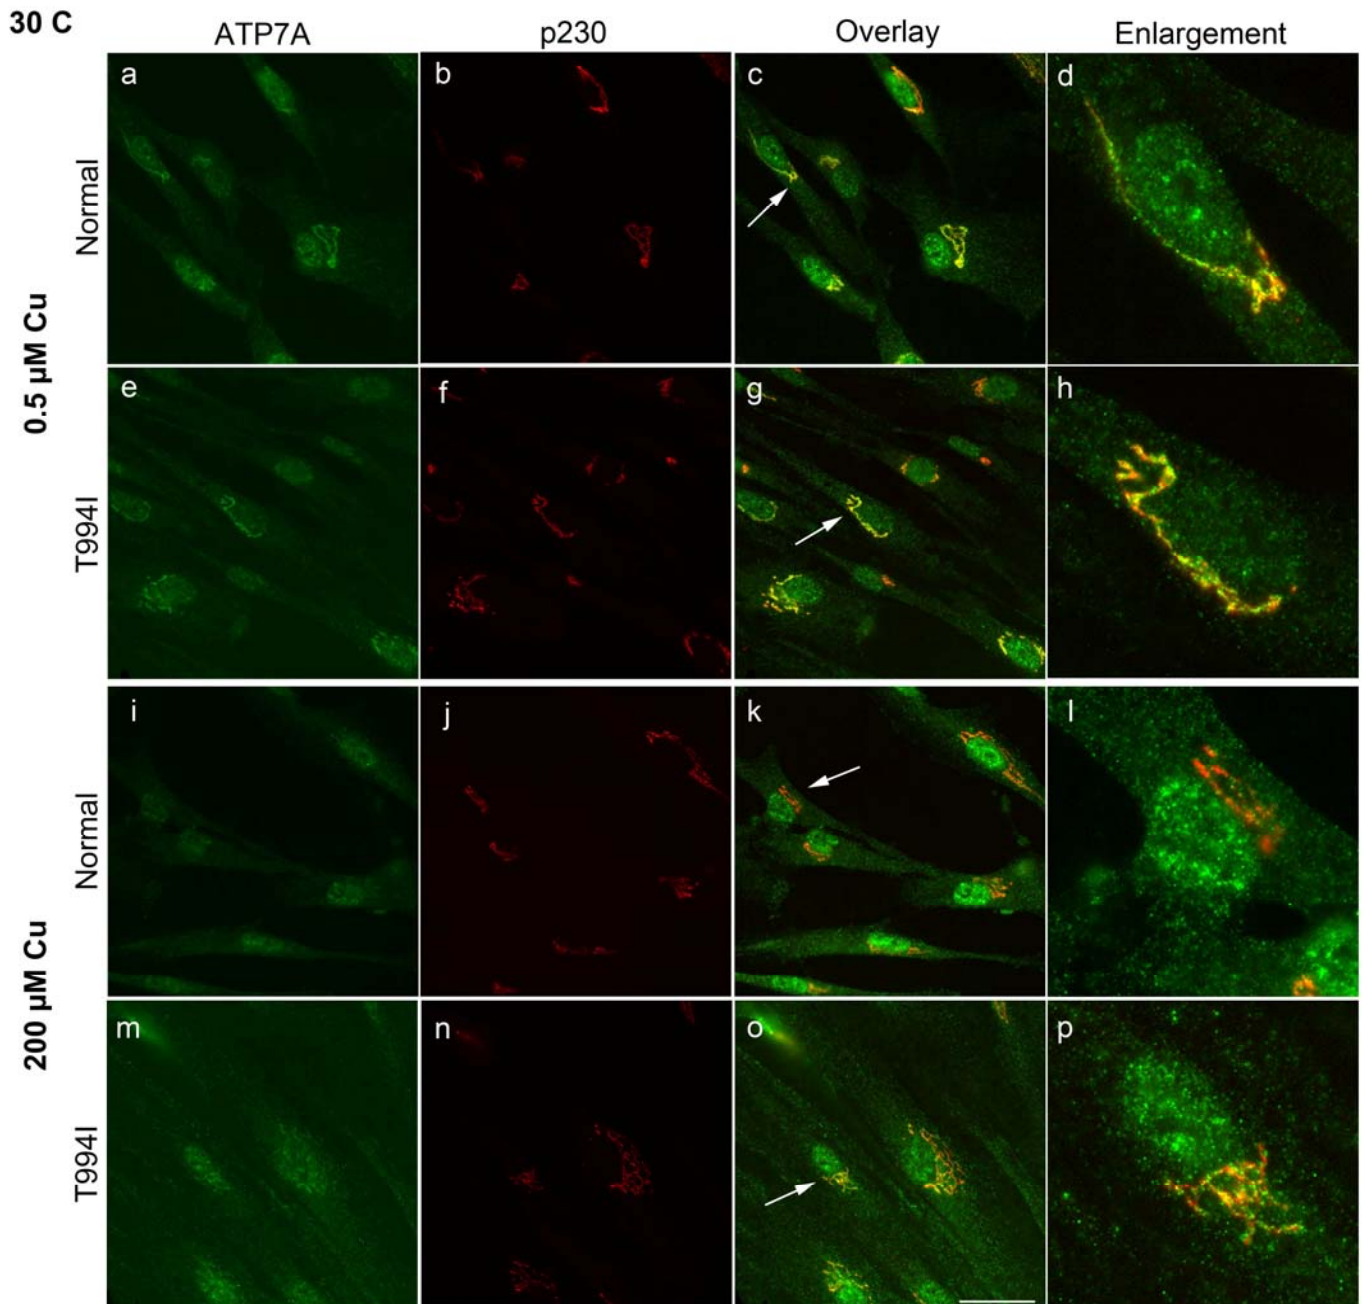

In 0.5 $\mu$ M copper, both wild type (panel a and c) and T994I mutant (panel e and g) ATP7A (green in these panels) show extensive co-localization with the p230 *trans* Golgi marker (red in panel b and f) overlay in panel c and g. In 200 $\mu$ M copper, the wild type ATP7A shows trafficking out of the *trans* Golgi (i) with minimal co-localization with p230 (overlay in k). In contrast, the mutant T994I ATP7A shows retention in the *trans* Golgi (panel m) and extensive perinuclear yellow remains indicating co-localization with the p230 marker (panel o). To further demonstrate the difference in trafficking, cells indicated by the white arrows were enlarged and are shown in panels d, h l and p. Panels d and h clearly show the extensive areas of co-localization of both the wild type and T994I ATP7A in 0.5  $\mu$ M copper. Panel l shows the complete trafficking of ATP7A from the *trans* Golgi leaving only red staining of p230 in the *trans* Golgi. Panel p shows extensive areas of yellow indicating much of the mutant ATP7A remains in the *trans* Golgi. Photographs were taken using a 63X objective with a Leica TCS SP2 confocal microscope (scale bar is 40  $\mu$ m).
